# Supplementary material
Source: MDPI journal article supplement (https://www.mdpi.com/2073-4395/12/5/1224)
Supplement: s1 [file s1]

**Supplementary Table S1.** Mean squares from the ANOVA for the examined components of kernel quality in *su1* sweet corn genotypes.

| Source of variability | df | Kernel<br>moisture | Glucose | Fructose | Sucrose | Total<br>sugars | Phyto-<br>glycogen | Total<br>phenols | DPPH    | Kernel<br>color |
|-----------------------|----|--------------------|---------|----------|---------|-----------------|--------------------|------------------|---------|-----------------|
| Year (Y)              | 1  | 8.3*               | 23.7**  | 6.9**    | 41.0*   | 210.3**         | 20.7               | 10283.8*         | 191.4*  | 2715.9**        |
| Error a               | 2  | 0.8                | 0.1     | 0.0      | 2.0     | 4.2             | 3.3                | 261.0            | 7.0     | 0.6             |
| Genotype (G)          | 8  | 40.4**             | 2.4**   | 1.0**    | 15.0**  | 32.3**          | 1.5                | 26963.8**        | 108.0*  | 150.5**         |
| Y x G                 | 8  | 2.1                | 1.0**   | 1.0**    | 4.8     | 6.1             | 4.5                | 5333.8           | 31.8    | 40.8            |
| Error b               | 16 | 2.4                | 0.1     | 0.1      | 1.4     | 1.9             | 1.0                | 6094.4           | 10.4    | 6.7             |
| Harvest date (DAP)    | 4  | 277.1**            | 20.4**  | 16.4**   | 114.3** | 341**           | 250**              | 24717.7**        | 275.1** | 68.2**          |
| Y x DAP               | 4  | 4.9                | 0.7**   | 0.8      | 1.5     | 10.5**          | 0.6                | 5092.2*          | 101.5** | 12.7*           |
| Error c               | 8  | 1.9                | 0.10    | 0.2      | 0.5     | 1.2             | 2.8                | 351.4            | 2.9     | 2.3             |
| DAP x G               | 32 | 1.8*               | 0.3**   | 0.3      | 1.8     | 4.5*            | 2.5                | 236.7            | 25.1**  | 3.9             |
| Y x DAP x G           | 32 | 1.2                | 0.4**   | 0.4*     | 2.8*    | 7.2**           | 3.4*               | 575.9            | 30.3**  | 2.2             |
| Error d               | 64 | 1.0                | 0.1     | 0.1      | 1.1     | 1.8             | 1.7                | 454.3            | 6.8     | 4.2             |

df - degrees of freedom; \*, \*\* Significant at the 0.05 and 0.01 probability levels, respectively
